# Supplementary material for: Yields and Yield Gaps in Lowland Rice Systems and Options to Improve Smallholder Production
Source: MDPI journal article supplement (doi:10.3390/agronomy12030552), 2022-02-23
Supplement: s1 [file s1]

Archive with 1 entries (1 files):
- agronomy-1589799-supplementary.pdf
