# Supplementary material for: Yields and Yield Gaps in Lowland Rice Systems and Options to Improve Smallholder Production
Source: MDPI journal article supplement (doi:10.3390/agronomy12030552), 2022-02-23
Supplement: s1 [file s1 › agronomy-1589799-supplementary.pdf]

**Supplementary Table S1.** On-farm grain yield (g m<sup>-2</sup>) for four treatments and four different planting lots, Doho, 2019. Planting lot 1 corresponds to the dry season, planting lots 2 and 3 were planted during the first rainy season and planting lot 4 during the second rainy season.

| Treatment | Planting Lot        |                    |                     |                    |
|-----------|---------------------|--------------------|---------------------|--------------------|
|           | 1 (January)         | 2 (March)          | 3 (April)           | 4 (August)         |
| FP        | 324 (se=8.7, n=21 ) | 327 (se=14.2, n=8) | 385 (se=6.0, n=45)  | 351 (se=6.3, n=40) |
| FIP       | 359 (se=10.5, n=14) | 466 (se=27.9, n=2) | 430 (se=8.4, n=22)  | 383 (se=9.5, n=17) |
| RAP       | 364 (se=8.7, n=21 ) | 397 (se=14.2, n=8) | 433 (se=6.0, n=45)  | 385 (se=6.3, n=40) |
| RAP+NPK   | 445 (se=22.7, n=3)  | 422 (se=39.3, n=1) | 501 (se=12.4, n=10) | 451 (se=17.6, n=5) |

The different planting lots had no significant effect ( $p>0.24$ ) on grain yield for the different treatments.

FP = farmers' practice, FIP = farmers' intensification practice; RAP = recommended agronomic practices without fertilization; RAP+NPK = recommended agronomic practices combined with NPK fertilization; se = standard error of means; n = number of fields planted for each treatment in a planting lot. Month in parentheses is the planting time for the lot.
